# 1 Genetic analyses of medication-use and implications for precision medicine

2  
3 Yeda Wu<sup>1</sup>, Enda M. Byrne<sup>1</sup>, Zhili Zheng<sup>1,2</sup>, Kathryn E. Kemper<sup>1</sup>, Loic Yengo<sup>1</sup>, Andrew J.  
4 Mallett<sup>1,3</sup>, Jian Yang<sup>1,2,4</sup>, Peter M. Visscher<sup>1,4,\*</sup>, Naomi R. Wray<sup>1,4,\*</sup>

5  
6 <sup>1</sup> Institute for Molecular Bioscience, The University of Queensland, Brisbane, Queensland 4072, Australia.

7 <sup>2</sup> Institute for Advanced Research, Wenzhou Medical University, Wenzhou, Zhejiang 325027, China.

8 <sup>3</sup> Department of Renal Medicine, Royal Brisbane and Women's Hospital, Herston, Queensland 4029, Australia.

9 <sup>4</sup> Queensland Brain Institute, The University of Queensland, Brisbane, Queensland 4072, Australia.

10 \* These authors jointly supervised this work; corresponding authors: [naomi.wray@uq.edu.au](mailto:naomi.wray@uq.edu.au) and  
11 [peter.visscher@uq.edu.au](mailto:peter.visscher@uq.edu.au)

## 12 13 **Abstract**

14 It is common that one medication is prescribed for several indications, and conversely that  
15 several medications are prescribed for the same indication, suggesting a complex biological  
16 network for disease risk and its relationship with pharmacological function. Genome-wide  
17 association studies (GWASs) of medication-use may contribute to understanding of  
18 disease etiology, generation of new leads relevant for drug discovery and quantify prospects  
19 for precision medicine. We conducted GWAS to profile self-reported medication-use from 23  
20 categories in approximately 320,000 individuals from the UK Biobank. A total of 505  
21 independent genetic loci that met stringent criteria for statistical significance were identified.  
22 We investigated the implications of these GWAS findings in relation to biological  
23 mechanism, drug target identification and genetic risk stratification of disease. Amongst the  
24 medication-associated genes were 16 known therapeutic-effect target genes for medications  
25 from 9 categories.

## 26 27 **Introduction**

28 Susceptibility to most common human diseases is complex and multifactorial, involving both  
29 genetic, environmental and stochastic factors<sup>1</sup>. During the last decade, large-scale genome-  
30 wide association studies (GWASs) have identified thousands of single nucleotide  
31 polymorphisms (SNPs) associated with diseases and related traits, consistent with a  
32 polygenic genetic architecture of common disease. These results add useful human-relevant  
33 information to drug development, drug repurposing and clinical trial pipelines<sup>2</sup>. Here, we  
34 have turned the tables, aiming to identify genetic loci associated with medication-taking. In  
35 the context of electronic health record data, medication-use may be an easy route to identify  
36 disease-case subjects. However, in clinical practice, it is common that one medication is  
37 prescribed for several indications, but conversely, several medications can be prescribed for  
38 the same indication. It is likely that medication-use reflects not only similarity between  
39 different clinical manifestations<sup>3</sup> and/or comorbidity<sup>4</sup> of diseases but also heterogeneity of  
40 clinical manifestation (symptoms and signs) and of intervention response (for example, from  
41 lifestyle change to the combination of treatments).

42  
43 We hypothesise that genetic variants associated with taking medications categorised based on  
44 anatomical and therapeutic classifications may add additional relevant information to  
45 understanding the underlying biological mechanism of diseases and drug development  
46 approaches. Here, we study genetic variation in current medication-use. We report 505 loci  
47 independently associated with medication categories. We explore these GWAS findings for  
48 biological mechanisms and as drug targets. We estimate the genetic correlation between the  
49 23 medication traits, and with other diseases and traits using published GWAS results. We  
50 use Mendelian Randomization to investigate putative causal relationships among diseases

51 and traits. We show that genetic predisposition to common disease predicts likelihood of  
52 taking relevant medications, a significant finding in relation to future practice of precision  
53 medicine for common disease.

54

## 55 **Results**

### 56 **Case-control GWAS of medication-use**

57 Medications taken by UKB participants were classified using the Anatomical Therapeutic  
58 Chemical Classification System<sup>5</sup> and provided in **Figure 1** and **S1, Table S1**. **Figure S2**  
59 shows the demographics of participants with medication records. The full phenotype  
60 extraction pipeline for UKB participants is summarised in **Figure S3**. An overview of  
61 analyses is provided in **Figure S4**. The medication-use case-control GWASs identify 910  
62 within-trait independent SNPs significantly associated ( $P < 5 \times 10^{-8}$ ) across 23 medication  
63 traits (**Figure 2 and S5**). After applying a more stringent multiple testing threshold ( $P < 1e-$   
64  $8/23$ )<sup>6</sup>, a total of 505 SNPs remain (**Table S2 and S3**), with per-trait associations ranging  
65 from 0 (C02: hypertensives, N02A:opioids, N06A: antidepressants) to 103 (C09: agents  
66 acting on renin-angiotensin system) SNPs. Many of the associated SNPs may simply be a  
67 reflection of the primary indication for which the medication is prescribed (**Table S4**). For  
68 example, C09 medications have therapeutic effect on hypertension; of the 103 independent  
69 SNPs associated with C09 medications ( $P < 10^{-8}/23$ ), we identified SNPs previously linked to  
70 hypertension (7 SNPs)<sup>7</sup>, systolic blood pressure (32 SNPs)<sup>8</sup>, diastolic blood pressure (5  
71 SNPs)<sup>9</sup> and pulse pressure (2 SNPs)<sup>9</sup>. Of the 55 independent SNPs associated with C10AA  
72 (HMG CoA reductase inhibitors)-associated SNPs ( $P < 10^{-8}/23$ ), 19 SNPs have been reported  
73 to be significantly associated with low-density lipoprotein cholesterol (LDLC)<sup>10</sup>, supporting  
74 the known biological mechanism that statins are effective in lowering LDLC. However, for 3  
75 medication-taking traits either small or no GWAS have been conducted for the medication-  
76 relevant indications, including A02B (drugs for peptic ulcer and gastro-oesophageal reflux  
77 disease), H03A (thyroid preparations) and N02BE (anilides).

78

### 79 **Genetic predisposition to common disease predicts medication-taking**

80 We undertook polygenic risk prediction analyses using GWAS summary statistics from 8  
81 published disease/traits (**Table S5**) as discovery data to predict disease risk in 9 medication-  
82 taking phenotypes as target data. Participants in the UK Biobank with a high GRS for  
83 different diseases/traits have a higher odds of taking corresponding medications than those  
84 with a low GRS (**Figure 3; Table S6**). The top decile of individuals ranked on risk prediction  
85 for depression had an odds ratio (OR) of 1.7 in taking anti-depressants compared to the  
86 bottom decile. Similarly comparing top and bottom deciles, we find an OR of 3.1 for taking  
87 anti-diabetic medication (A10) for individuals ranked on genetic risk for type 2 diabetes and  
88 of 3.3 for taking immunosuppressants (L04) for individuals ranked on their genetic risk for  
89 rheumatoid arthritis (RA). The OR increased to 5.2 for taking L04 medications specific to  
90 RA (**Table S1**).

91

### 92 **GWAS results and biological mechanisms**

93 First, we estimated SNP-heritability of the 23 traits using linkage disequilibrium (LD) score  
94 regression<sup>11</sup> (**Figure S6; Table S7**), all traits showed SNP-heritability (proportion of variance  
95 attributed to genome-wide SNPs) significantly different from zero to a maximum of 0.15 (s.e.  
96 0.008) for N02A (opioid medications) on the estimated scale. Second, to identify medication-  
97 relevant tissue/cell types, we partitioned the SNP-heritability<sup>12</sup> based on annotations of SNPs  
98 to genes, and genes to differential gene expression between tissues. Among the 23  
99 medication-taking traits, 8 traits showed significantly enriched association with genes  
100 expressed in at least one tissue at a false discovery rate (FDR)  $< 5\%$  (**Figure S7**). GWAS

101 associations for thyroid preparations (H03A), immunosuppressants (L04), adrenergics  
102 inhalants (R03A), glucocorticoid (R06BA) and antihistamines for systemic use (R06A) were  
103 enriched in immune cell types. Those of opioid analgesics (N02A) were enriched in central  
104 nervous system tissues, such as limbic system, those of antimigraine preparations (N02C)  
105 were enriched in cardiovascular tissue, and those of drugs affecting bone structure and  
106 mineralization (M05B) were enriched in digestive cell type (**Table S8**).

107  
108 Third, we investigated whether associations between SNPs and medication-taking traits were  
109 consistent with mediation through gene expression, based on associations between SNPs and  
110 gene expression (eQTLs). We identified 177 unique genes for which expression is  
111 significantly associated with 19 medication-taking categories (**Table S9**) using summary  
112 data-based Mendelian Randomization (SMR) analysis<sup>13</sup>. Gene-based association tests were  
113 conducted using MAGMA<sup>14</sup> from the GWAS SNP results for each of the 23 medication-  
114 taking traits and a total of 1,841 significantly associated unique genes were identified (**Table**  
115 **S10**). To provide biological insights from the GWAS associated loci, we used the gene-based  
116 association test summary statistics to test for enrichment in 10,891 gene sets from MSigDB  
117 (v5.2)<sup>15,16</sup>. All 23 medication-taking traits were enriched in at least one gene set at FDR < 5%  
118 (**Table S11**). Several of the results showed plausible relevant biological mechanisms. For  
119 example, the genetic associations for taking A10 (drugs used in diabetes) were enriched for  
120 the glucose homeostasis gene set, those for taking C10AA (statins) were enriched in the  
121 cholesterol homeostasis gene set, C09 (agents acting on renin-angiotensin system) for  
122 cardiovascular-related gene sets, M05B (drugs affecting bone structure and mineralization)  
123 for skeletal system development, chondrocyte differentiation gene sets, N02A for gene sets of  
124 behavioural response to cocaine and neurogenesis and lastly H03A, L04, R03A, R03BA  
125 medications for immune-related gene sets. Interestingly, genes associated with taking A02B  
126 (drugs for peptic ulcer and gastro-oesophageal reflux disease) are enriched in gene sets of  
127 central nervous system neuron differentiation and of neurogenesis, highlighting the  
128 connection between gut and brain<sup>17</sup>.

### 129 130 **Linking genes associated with medication-taking to drug targets**

131 Secondary analyses of GWAS results not only provide insights into the biological complexity  
132 of common diseases, but also offer opportunities relevant to drug development and  
133 repurposing<sup>2,18,19</sup>. To determine whether genes associated with medication-taking could  
134 provide clues relevant to drug target identification, we performed analyses using drug-target  
135 lists from Santos *et al.*<sup>5</sup>, ChEMBL<sup>20</sup> and ClinicalTrials.gov (<https://www.clinicaltrials.gov/>)  
136 database as reference. First, for each UKB medication category, we investigated whether  
137 there are therapeutic-effect target genes for medications classified in that medication  
138 category; a total of 9 genes were identified (**Table S12**). For example, we find *HMGCR*  
139 (Entrez ID: 3156) is, as expected<sup>21</sup>, associated with taking C10AA medications (statins) and  
140 encodes the HMGCR protein which is targeted by medications from C10AA category.  
141 Second, we tested whether there are therapeutic-effect target genes for treating indications  
142 relevant to taking medications of each category; a total of 7 genes were identified (**Table**  
143 **S12**). *PCSK9* (Entrez ID: 255738) in our analyses is also associated with taking C10AA  
144 medications, and encodes the protein mediating lowering-cholesterol effect of evolocumab  
145 (ATC code : C10AX13) and alirocumab (ATC code: C10AX14). Third, we looked at  
146 whether there are therapeutic-effect target genes (ever or currently in clinical trial and not  
147 approved by FDA yet) for treating indications relevant to medications of each category; a  
148 total of 8 genes were identified (**Table S13**). For example, *TSLP* (Entrez ID: 85480) is  
149 associated with R03A (adrenergics), R03BA (glucocorticoids) and R06A (antihistamines)  
150 and also mediates the effect of tezepelumab for the treatment of uncontrolled asthma<sup>22</sup>.

151 Hence, among our associated genes are 24 genes with some known evidence of therapeutic  
152 effect. Therefore, we anticipate that novel genes that are associated with medication may help  
153 to prioritise other putative therapies<sup>23</sup>. In **Table S14** we provide additional analyses for two  
154 genes, *IDE* and *AGT* that we believe merit further study for type 2 diabetes and C07/C09  
155 related disorders, respectively.

156

### 157 **Shared genetic architecture between medication-taking traits and relevant complex** 158 **traits**

159 The genetic correlation ( $r_g$ ) between the 23 medication-taking traits and 21 traits/diseases  
160 (**Table S5**) related to them were calculated using bivariate LD score regression<sup>24</sup>. Many  $r_g$   
161 estimated were significantly different from zero. For example, body mass index, educational  
162 attainment (EA), former/current smoker and coronary artery disease were significantly  
163 correlated with most of the medication categories in expected directions. Major depression  
164 and neuroticism showed positive  $r_g$  with A02B (gastro-oesophageal reflux drugs), suggesting  
165 a link between the brain and the digestive system. Type 2 diabetes showed correlations with  
166 taking medications C02, C03, C07~C09 and C10AA, implying a shared genetic architecture  
167 of type 2 diabetes, hypertension and hypercholesterolemia. The  $r_g$  between B01A and  
168 N02BA show similar patterns of  $r_g$  with other diseases/traits are similar to those for N02BA  
169 medications with other diseases/traits because the original medication aspirin (code number:  
170 1140868226, 59150 individuals in our analysis) has multiple ATC codes (A01AD05,  
171 B01AC06 and N02BA01). Full results are presented in **Figure 4** and **Table S15**.

172

### 173 **Putative causal relationship of diseases for using medication**

174 It is reasonable to assume that having a disease is causal for taking the associated medication  
175 (rather than reverse causation). Therefore, we used Mendelian Randomisation (MR) in a  
176 proof-of-principle analysis to quantify causality. Independent SNPs ( $P$ -value  $< 5E-8$ )  
177 associated with 15 selected diseases/traits (**Table S5**) were used as instruments to evaluate  
178 putative causal relationships<sup>25</sup> among these 15 diseases/traits and the 23 medication-taking  
179 traits (**Table S16 and Figure 5**). Increasing BMI increases the likelihood of taking A10,  
180 B01A, C01D, C02, C03, C07, C08, C09, C10AA, R03A medications, consistent with the role  
181 of BMI across diseases related to these medications<sup>25</sup>. The effect of obesity on bone health is  
182 controversial<sup>26</sup>. However, results from our analysis clearly show that increasing BMI  
183 decreases the likelihood of taking M05B (bone-associated) medications (OR 0.68 per SD of  
184 BMI). Major depression (MD) increases the likelihood of taking A02B medication (drugs for  
185 peptic ulcer and gastro-oesophageal reflux disease; 1.23-fold increase per SD in liability to  
186 MD), capturing a link between the brain and the digestive system. In addition to this, MD  
187 increases the likelihood of taking N02BE (1.23-fold increase per SD in liability to MD)  
188 medication, which is consistent with comorbidity of pain in some MD patients<sup>27</sup>.

189

### 190 **Discussion**

191 To our knowledge, this is the first paper profiling genetic contributions to medication-use.  
192 Traditional GWAS identify DNA variants associated with disease, with a goal that these  
193 discoveries ultimately may open the door to new drug treatments. Here, we have taken the  
194 reverse approach, aiming to identify DNA variants associated with medication-taking, in  
195 recognition that underlying biology may contribute to the same medication being prescribed  
196 for several indications, and conversely that only some of those with a given diagnosis may  
197 take a particular medication. As expected, some of our results for medication-taking  
198 recapitulate GWAS results of the disease traits for which the medication is prescribed.  
199 However, we have also identified some novel associations that may be worthy of follow-up.

200 We identified 505 linkage disequilibrium independent SNPs associated ( $P < 1e-8/23$ ) with  
201 different medication-taking traits. For some of our traits, large GWAS for the medication  
202 relevant indications have not been conducted, such as A02B (drugs for peptic ulcer and  
203 gastro-oesophageal reflux disease, 2 SNPs) and N02BE (anilides, 4 SNPs). Notably, 76 SNPs  
204 were associated with H03A (thyroid preparations – the main indication is hypothyroidism),  
205 only 11 of these loci have been previously reported to be associated with hypothyroidism.  
206 Conditional (mtCOJO) analysis suggested that these 76 SNPs associated with taking H03A  
207 medication are indeed associated with hypothyroidism. We showed that individuals with  
208 higher genetic risk of disease have higher likelihood to take relevant medications, for  
209 example, individuals with higher GRS for RA have an OR of 3.3 to take immunosuppressants  
210 compared with lower GRS individuals (**Figure 3**), thereby providing a proof-of-principle  
211 validation of precision medicine based upon risk prediction of common diseases, since  
212 individuals with high genetic risk of disease can be identified well before the onset of  
213 symptoms and the time of medication prescription.

214  
215 To provide biological insight to the SNP associations for medication-taking<sup>28</sup>, we linked  
216 GWAS findings to relevant biological gene sets and drug target efficacy. These analyses  
217 generated a series of expected or plausible results, such as genes associated with taking A10  
218 (drugs used in diabetes) enriched in gene sets for glucose homeostasis. Our analyses also  
219 generate new hypotheses; genes associated with taking N06A (antidepressants) showed  
220 enrichment in the gene set for the synthesis and secretion and diacylation of ghrelin, a gut-  
221 derived hormone<sup>29</sup>. Previous studies have described an antidepressant-like role of ghrelin<sup>30,31</sup>.  
222 This line of evidence suggests that testing a pharmacological effect of ghrelin on depression  
223 may be worthwhile. Although medication-associated genes overlapped with only a small  
224 proportion of current drug target genes, the framework of genetic association studies provides  
225 a potentially valuable resource for new drug target identification and prediction of  
226 unfavourable side effects<sup>18</sup>.

227  
228 Comorbidity is commonly observed in clinical practice, which means the presence of  
229 additional diseases in relation to an index disease<sup>32</sup>. Results from genetic correlation and  
230 disease-medication (exposure-outcome) MR highlight potential shared aetiology, and may  
231 help explain medication use in clinical practice. Our analysis showed that major depression  
232 increased the likelihood of taking A02B (drugs for peptic ulcer and gastro-oesophageal reflux  
233 disease) and N02BE (anilides), the latter consistent with reports that antidepressant  
234 prescriptions are not only indicated for depression, but also for pain<sup>33</sup>.

235  
236 There are a number of limitations in our study. First, although the medication-use data were  
237 obtained by trained nurses during interviews, the self-reported nature may limit the accuracy  
238 of information. Second, the ambiguous names of medications may limit the accurate  
239 classification of medications. The reasons (e.g. disease diagnosis) for taking medication were  
240 not recorded and hence not available for further analysis, nor were duration and dosage of  
241 medications. Third, our findings are specific to the UK biobank participants, which are  
242 recognized to be a non-random sample of the UK population. Fourth, the medication-taking  
243 in UK biobank participants may be more representative of medication-taking in the UK and  
244 may not translate to other populations and different health systems.

245  
246 In summary, we identified 505 independent loci associated with different medication-use in  
247 318,177 individuals from UKB, with implications for biological mechanisms, drug target  
248 identification and precision medicine for common disease.

249

## 250 **Methods**

### 251 **Medication data**

252 We used self-report data of regular medication (prescription and over-the-counter) and health  
253 supplements taken weekly, monthly or three-monthly from participants in the United  
254 Kingdom Biobank (UKB) study (<http://www.ukbiobank.ac.uk>)<sup>34</sup>, mainly aged 37-73 years  
255 when recruited between 2006 and 2010. Medication and health supplements data were coded  
256 and manually mapped to their corresponding active ingredients and then to their Anatomical  
257 Therapeutic Chemical (ATC) Classification System<sup>5</sup> codes (**Table S1**). In total, medications  
258 were classified into 1,752 categories, collapsing to 184 subgroups according to the first three  
259 ATC levels (**Figure 1, S1**). 23 of these medication subgroups (based on participant numbers)  
260 were selected for analysis. Detailed methods are provided in the **Supplementary Appendix**.

261

### 262 **Genome-wide association study design and statistical analysis**

263 Analyses used genome-wide genotypes for 318,177 participants of white European descent  
264 (**Figure S2**). 23 medication-taking case groups and their corresponding control groups were  
265 generated. Case groups were defined as those taking medications classified at the same ATC  
266 level. Control groups comprised participants taking neither the case medication nor similar  
267 medications. Similar medications were defined as those sharing the first two ATC levels as  
268 the case medication or medications containing the case medication active ingredients.  
269 Following standard quality control and genotype imputation methods (see **Supplementary**  
270 **Appendix**), 7,288,503 SNPs with minor allele frequency (MAF) > 0.01 were used in  
271 analyses. Case-control genome-wide association analyses were conducted using BOLT-  
272 LMM<sup>35</sup> with age, sex, assessment centre and 20 genetic principal components fitted as  
273 covariates. Conditional analyses tested if SNPs associated with taking medications have been  
274 previously linked to their corresponding medication-specific related indications/traits<sup>36,37</sup>.  
275 Multi-trait-based conditional and joint (mtCOJO) analyses tested if medication-taking  
276 associated SNPs are also associated with their relevant main indications in UKB<sup>25</sup>.

277 Genetic risk score (GRS) for UKB individuals were generated for 8 diseases using SNP  
278 effect size estimates from published GWAS summary statistics (discovery sample data)  
279 (**Table S2**). These GRS were used to predict the medication use traits related to these  
280 diseases (asthma mapped to two medication use traits). Selection of the discovery samples  
281 data was based on relationship to the medication-taking traits, availability of GWAS  
282 summary statistics, cohort ancestry and no sample overlap with UKB. GRS were generated  
283 for a range of discovery data association  $P$  value thresholds ( $5 \times 10^{-8}$ ,  $1 \times 10^{-5}$ ,  $1 \times 10^{-4}$ , 0.001,  
284 0.01, 0.05, 0.1, 0.5). The GRS were evaluated as medication-taking odds ratio for each GRS  
285 decile (relative to the 1<sup>st</sup> decile).

286 LD score regression<sup>11,24</sup> was used to estimate the proportion of variance attributable to  
287 genome-wide SNPs ( $h_{SNP}^2$ ) and to quantify genetic sharing at common variants across the 23  
288 medication-taking traits and other traits. LD score regression for cell type specific analysis<sup>12</sup>  
289 was applied to test the  $h_{SNP}^2$  enrichment in different tissues for each of the 23 medication-  
290 taking traits. Gene expression data of 205 tissues (53 from GTEx<sup>38</sup> and 152 from other  
291 sources<sup>39,40</sup>) were used for analyses. Summary-data-based Mendelian Randomization  
292 (SMR)<sup>13</sup> was used to integrate our trait association with blood expression quantitative trait  
293 loci (eQTL, i.e., SNP-gene expression association) data<sup>41</sup>. Gene-based association analyses  
294 were conducted using MAGMA (v1.06)<sup>14</sup> to identify genes associated with different  
295 medication-taking traits. Gene sets association analyses were conducted using MAGMA  
296 (v1.06)<sup>14</sup> with curated gene sets (c2.all) and gene ontology sets (c5.bp, c5.cc, c5.mf) from  
297 MSigDB (v5.2)<sup>15,16</sup>.

298 Mendelian Randomization (MR) was used to investigate a putative causal relationship  
299 between the 23 medication-taking traits and 15 significantly correlated traits (selected from

300 **Table S2**), using Generalized Summary-data-based MR (GSMR)<sup>25</sup>. We required that all  
301 analyses had at least 7 genome-wide significant loci to use as MR instruments; the median  
302 number of SNP instruments was 65.

303

### 304 **Analyses linking GWAS results to drugs and disease**

305 To check whether associated genes from MAGMA and SMR encode effect-mediating  
306 targets for FDA-approved medications or corresponding indications, we used information  
307 from Santos *et al.*<sup>5</sup>, based on medication approved by the FDA before June 2015. For those  
308 approved later, we used the ChEMBL database<sup>20</sup>. To check whether associated genes encode  
309 trait-relevant effect-mediating targets for drugs in clinical trial, we used ClinicalTrial.gov  
310 (<https://www.clinicaltrials.gov/>). The CLUE Touchstone tool (<https://clue.io/>)<sup>42</sup> was used to  
311 check the correlation between signatures of drugs and knocking down a gene.

312

### 313 **URLs**

314 UK Biobank: <http://www.ukbiobank.ac.uk>; ClinicalTrial.gov: <https://www.clinicaltrials.gov/>;  
315 CLUE Touchstone tool: <https://clue.io/>.

316

317

318

319

320

321

322

323

324

325

326

327

328

329

330

331

332

333

334

335

336

337

338

339

340

341

342

343

344

## 345 References

346

- 347 1 Hunter, D. J. Gene-environment interactions in human diseases. *Nature reviews.*
- 348 *Genetics* **6**, 287-298, (2005).
- 349 2 Nelson, M. R. *et al.* The support of human genetic evidence for approved drug
- 350 indications. *Nature genetics* **47**, 856, (2015).
- 351 3 Zhou, X., Menche, J., Barabási, A.-L. & Sharma, A. Human symptoms–disease
- 352 network. *Nature Communications* **5**, 4212, (2014).
- 353 4 Rzhetsky, A., Wajngurt, D., Park, N. & Zheng, T. Probing genetic overlap among
- 354 complex human phenotypes. *Proceedings of the National Academy of Sciences of the*
- 355 *United States of America* **104**, 11694-11699, (2007).
- 356 5 Santos, R. *et al.* A comprehensive map of molecular drug targets. *Nature reviews.*
- 357 *Drug discovery* **16**, 19-34, (2017).
- 358 6 Wu, Y., Zheng, Z., Visscher, P. M. & Yang, J. Quantifying the mapping precision of
- 359 genome-wide association studies using whole-genome sequencing data. *Genome*
- 360 *Biology* **18**, 86, (2017).
- 361 7 Ehret, G. B. *et al.* Genetic variants in novel pathways influence blood pressure and
- 362 cardiovascular disease risk. *Nature* **478**, 103-109, (2011).
- 363 8 Wain, L. V. *et al.* Novel Blood Pressure Locus and Gene Discovery Using Genome-
- 364 Wide Association Study and Expression Data Sets From Blood and the Kidney.
- 365 *Hypertension*, (2017).
- 366 9 Warren, H. R. *et al.* Genome-wide association analysis identifies novel blood pressure
- 367 loci and offers biological insights into cardiovascular risk. *Nature genetics* **49**, 403-
- 368 415, (2017).
- 369 10 Willer, C. J. *et al.* Discovery and refinement of loci associated with lipid levels.
- 370 *Nature genetics* **45**, 1274-1283, (2013).
- 371 11 Bulik-Sullivan, B. K. *et al.* LD Score regression distinguishes confounding from
- 372 polygenicity in genome-wide association studies. *Nature genetics* **47**, 291, (2015).
- 373 12 Finucane, H. K. *et al.* Heritability enrichment of specifically expressed genes
- 374 identifies disease-relevant tissues and cell types. *Nature genetics* **50**, 621-629, (2018).
- 375 13 Zhu, Z. *et al.* Integration of summary data from GWAS and eQTL studies predicts
- 376 complex trait gene targets. *Nature genetics* **48**, 481, (2016).
- 377 14 de Leeuw, C. A., Mooij, J. M., Heskes, T. & Posthuma, D. MAGMA: Generalized
- 378 Gene-Set Analysis of GWAS Data. *PLoS Computational Biology* **11**, e1004219,
- 379 (2015).
- 380 15 Subramanian, A. *et al.* Gene set enrichment analysis: A knowledge-based approach
- 381 for interpreting genome-wide expression profiles. *Proceedings of the National*
- 382 *Academy of Sciences* **102**, 15545-15550, (2005).
- 383 16 Liberzon, A. *et al.* The Molecular Signatures Database Hallmark Gene Set Collection.
- 384 *Cell Systems* **1**, 417-425, (2015).
- 385 17 Powell, N., Walker, M. M. & Talley, N. J. The mucosal immune system: master
- 386 regulator of bidirectional gut-brain communications. *Nature reviews.*
- 387 *Gastroenterology & hepatology* **14**, 143-159, (2017).
- 388 18 Finan, C. *et al.* The druggable genome and support for target identification and
- 389 validation in drug development. *Science translational medicine* **9**, (2017).
- 390 19 Nguyen, P. A., Deaton, A. M., Nioi, P. & Ward, L. D. Phenotypes associated with
- 391 genes encoding drug targets are predictive of clinical trial side effects. *bioRxiv*,
- 392 (2018).
- 393 20 Gaulton, A. *et al.* The ChEMBL database in 2017. *Nucleic Acids Research* **45**, D945-
- 394 D954, (2017).



- 395 21 Visscher, P. M. *et al.* 10 Years of GWAS Discovery: Biology, Function, and  
396 Translation. *American journal of human genetics* **101**, 5-22, (2017).
- 397 22 Corren, J. *et al.* Tezepelumab in Adults with Uncontrolled Asthma. *New England*  
398 *Journal of Medicine* **377**, 936-946, (2017).
- 399 23 Collins, F. S. Reengineering Translational Science: The Time Is Right. *Science*  
400 *translational medicine* **3**, 90cm17-90cm17, (2011).
- 401 24 Bulik-Sullivan, B. *et al.* An atlas of genetic correlations across human diseases and  
402 traits. *Nature genetics* **47**, 1236-1241, (2015).
- 403 25 Zhu, Z. *et al.* Causal associations between risk factors and common diseases inferred  
404 from GWAS summary data. *Nature Communications* **9**, 224, (2018).
- 405 26 Palermo, A. *et al.* BMI and BMD: The Potential Interplay between Obesity and Bone  
406 Fragility. *International Journal of Environmental Research and Public Health* **13**,  
407 544, (2016).
- 408 27 Jaracz, J., Gattner, K., Jaracz, K. & Górna, K. Unexplained Painful Physical  
409 Symptoms in Patients with Major Depressive Disorder: Prevalence, Pathophysiology  
410 and Management. *CNS Drugs* **30**, 293-304, (2016).
- 411 28 de Leeuw, C. A., Neale, B. M., Heskes, T. & Posthuma, D. The statistical properties  
412 of gene-set analysis. *Nature Reviews Genetics* **17**, 353, (2016).
- 413 29 Lutter, M. *et al.* The orexigenic hormone ghrelin defends against depressive  
414 symptoms of chronic stress. *Nature neuroscience* **11**, 752, (2008).
- 415 30 Bali, A. & Jaggi, A. S. An Integrative Review on Role and Mechanisms of Ghrelin in  
416 Stress, Anxiety and Depression. *Current drug targets* **17**, 495-507, (2016).
- 417 31 Huang, H.-J. *et al.* Ghrelin alleviates anxiety- and depression-like behaviors induced  
418 by chronic unpredictable mild stress in rodents. *Behavioural Brain Research* **326**, 33-  
419 43, (2017).
- 420 32 Valderas, J. M., Starfield, B., Sibbald, B., Salisbury, C. & Roland, M. Defining  
421 comorbidity: implications for understanding health and health services. *Annals of*  
422 *family medicine* **7**, 357-363, (2009).
- 423 33 Wong, J. *et al.* Treatment indications for antidepressants prescribed in primary care in  
424 quebec, canada, 2006-2015. *JAMA* **315**, 2230-2232, (2016).
- 425 34 Sudlow, C. *et al.* UK biobank: an open access resource for identifying the causes of a  
426 wide range of complex diseases of middle and old age. *PLoS medicine* **12**, e1001779,  
427 (2015).
- 428 35 Loh, P.-R., Kichaev, G., Gazal, S., Schoech, A. P. & Price, A. L. Mixed-model  
429 association for biobank-scale datasets. *Nature genetics*, (2018).
- 430 36 Yang, J., Lee, S. H., Goddard, M. E. & Visscher, P. M. GCTA: a tool for genome-  
431 wide complex trait analysis. *American journal of human genetics* **88**, 76-82, (2011).
- 432 37 Yang, J. *et al.* Conditional and joint multiple-SNP analysis of GWAS summary  
433 statistics identifies additional variants influencing complex traits. *Nature genetics* **44**,  
434 369, (2012).
- 435 38 GTEx Consortium. The Genotype-Tissue Expression (GTEx) pilot analysis:  
436 Multitissue gene regulation in humans. *Science (New York, N.Y.)* **348**, 648-660,  
437 (2015).
- 438 39 Pers, T. H. *et al.* Biological interpretation of genome-wide association studies using  
439 predicted gene functions. *Nature Communications* **6**, 5890, (2015).
- 440 40 Fehrmann, R. S. N. *et al.* Gene expression analysis identifies global gene dosage  
441 sensitivity in cancer. *Nature genetics* **47**, 115, (2015).
- 442 41 Westra, H. J. *et al.* Systematic identification of trans eQTLs as putative drivers of  
443 known disease associations. *Nature genetics* **45**, 1238-1243, (2013).

444 42 Subramanian, A. *et al.* A Next Generation Connectivity Map: L1000 Platform and the  
445 First 1,000,000 Profiles. *Cell* **171**, 1437-1452.e1417, (2017).

446  
447  
448  
449  
450  
451  
452  
453  
454  
455  
456  
457  
458  
459  
460  
461  
462  
463  
464  
465  
466  
467  
468  
469  
470  
471  
472  
473  
474  
475  
476  
477  
478  
479  
480  
481  
482  
483  
484  
485  
486  
487  
488

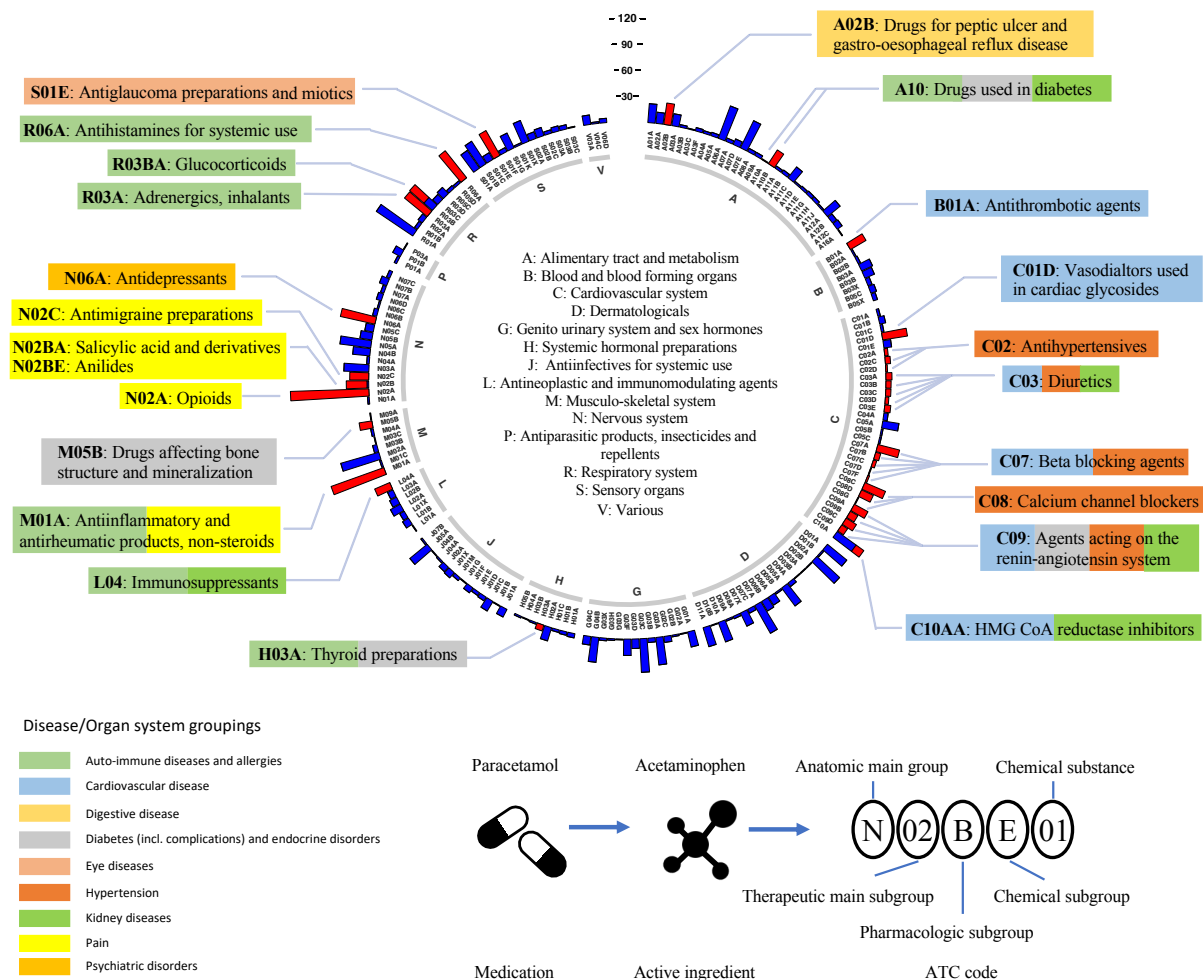

489 **Figure 1.** Distribution of 1,752 UKB medications at the first three ATC level.  
 490 The inner ring corresponds to the 1<sup>st</sup> level of the ATC code. The outer ring represents the first  
 491 3 level of the ATC code (184 subgroups). The length of the bar represents the number of  
 492 classified UKB medications assigned to that subgroup (numbers of participants are shown in  
 493 Figure 2). Red bars are the 23 medication-taking traits used in analyses (selected based on  
 494 participant numbers). The 23 medication-taking traits are grouped into 9 diseases and organ  
 495 system categories according to the main indications, which is highlighted using different  
 496 colours (legend bottom left). The legend at the bottom right shows how ATC codes are  
 497 assigned to each UKB medication.

498  
 499  
 500  
 501  
 502  
 503

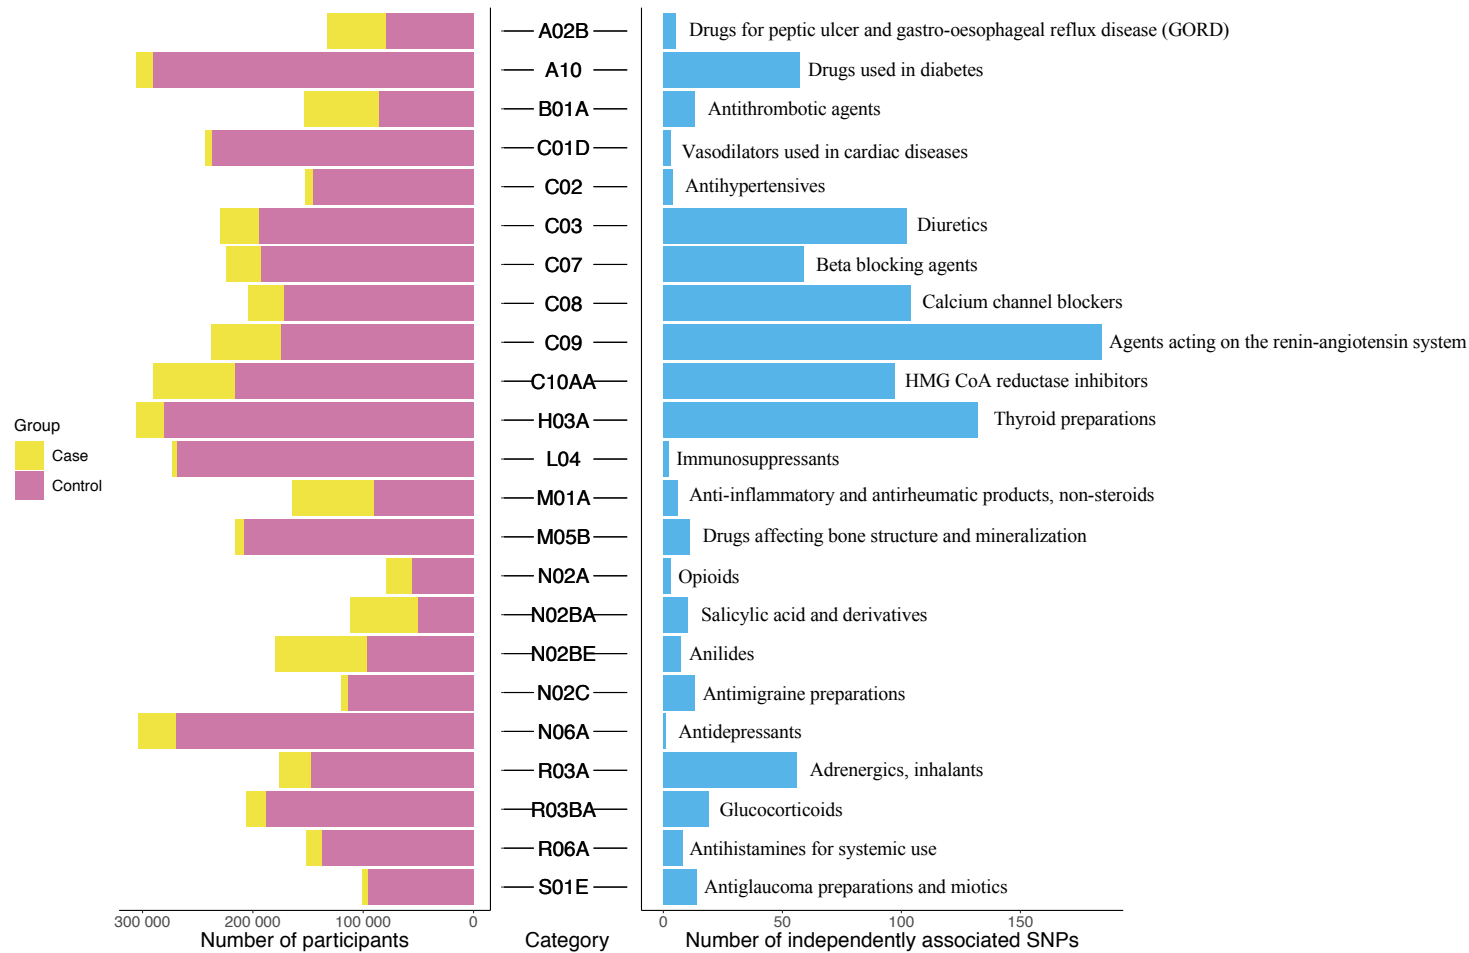

504 **Figure 2.** Summary of UKB medication-taking GWAS analyses.  
 505 Text on the right side of each bar represents the meaning of each medication-taking ATC coded trait.  
 506  
 507

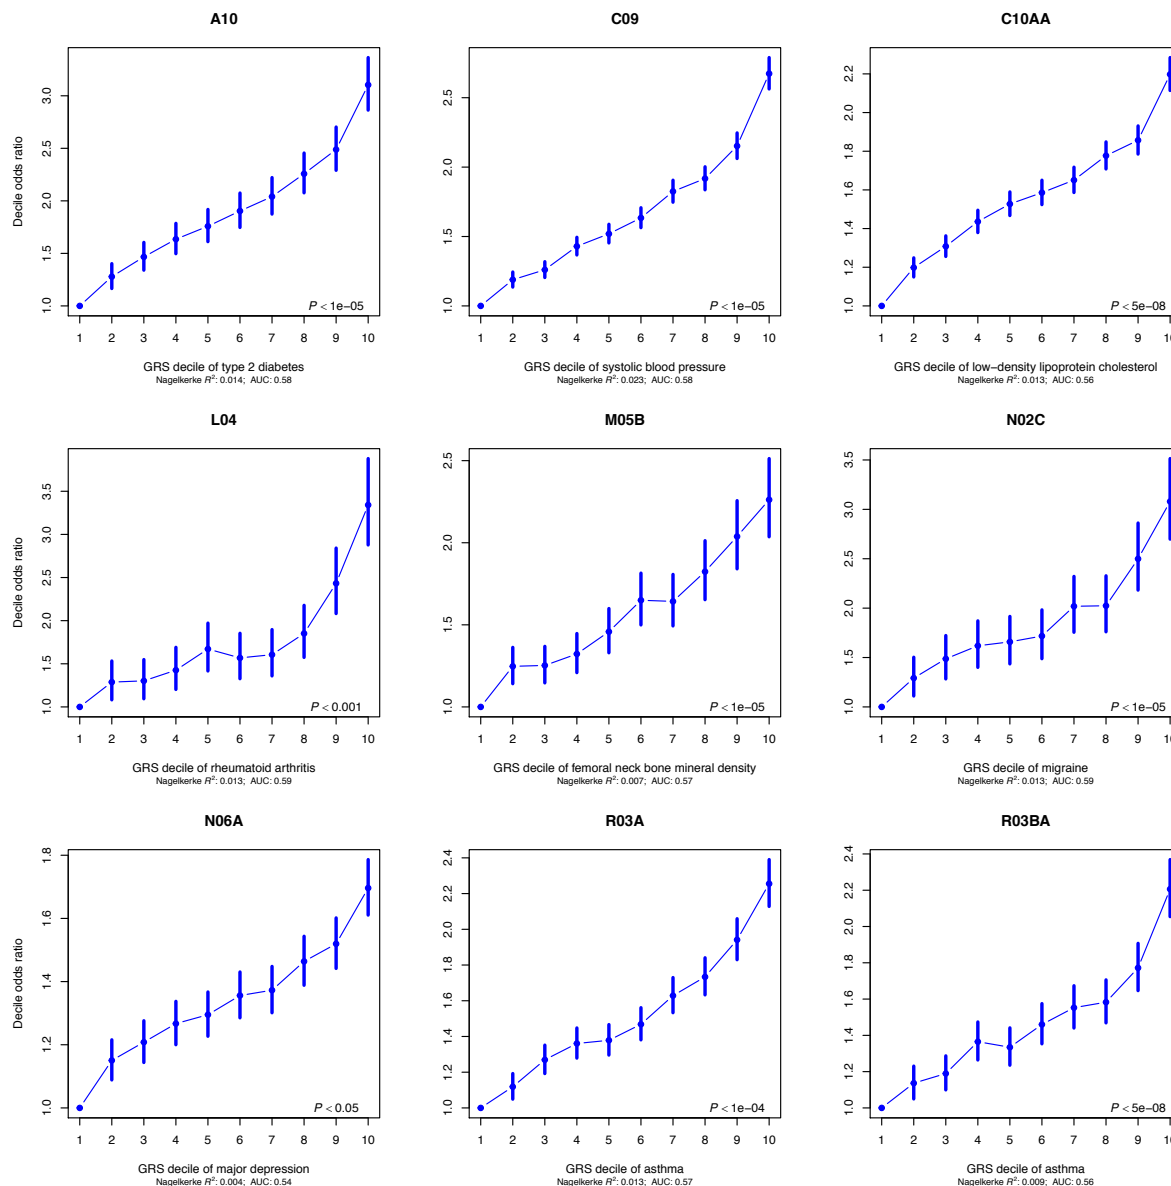

508 **Figure 3.** Odds ratio (OR) by genetic risk score (GRS) profile decile (1 = lowest, 10 =  
509 highest GRS), with OR reported relative to decile 1 as the reference.  
510 OR and 95% confidence intervals (blue bars) were estimated using logistic regression. The  $P$   
511 value in the bottom right hand corner of each plot refers to the  $P$ -value threshold in the  
512 discovery sample used to generate the GRS. Note: An increased GRS of femoral neck bone  
513 mineral density implies a lower density.

514  
515  
516  
517  
518  
519  
520  
521  
522

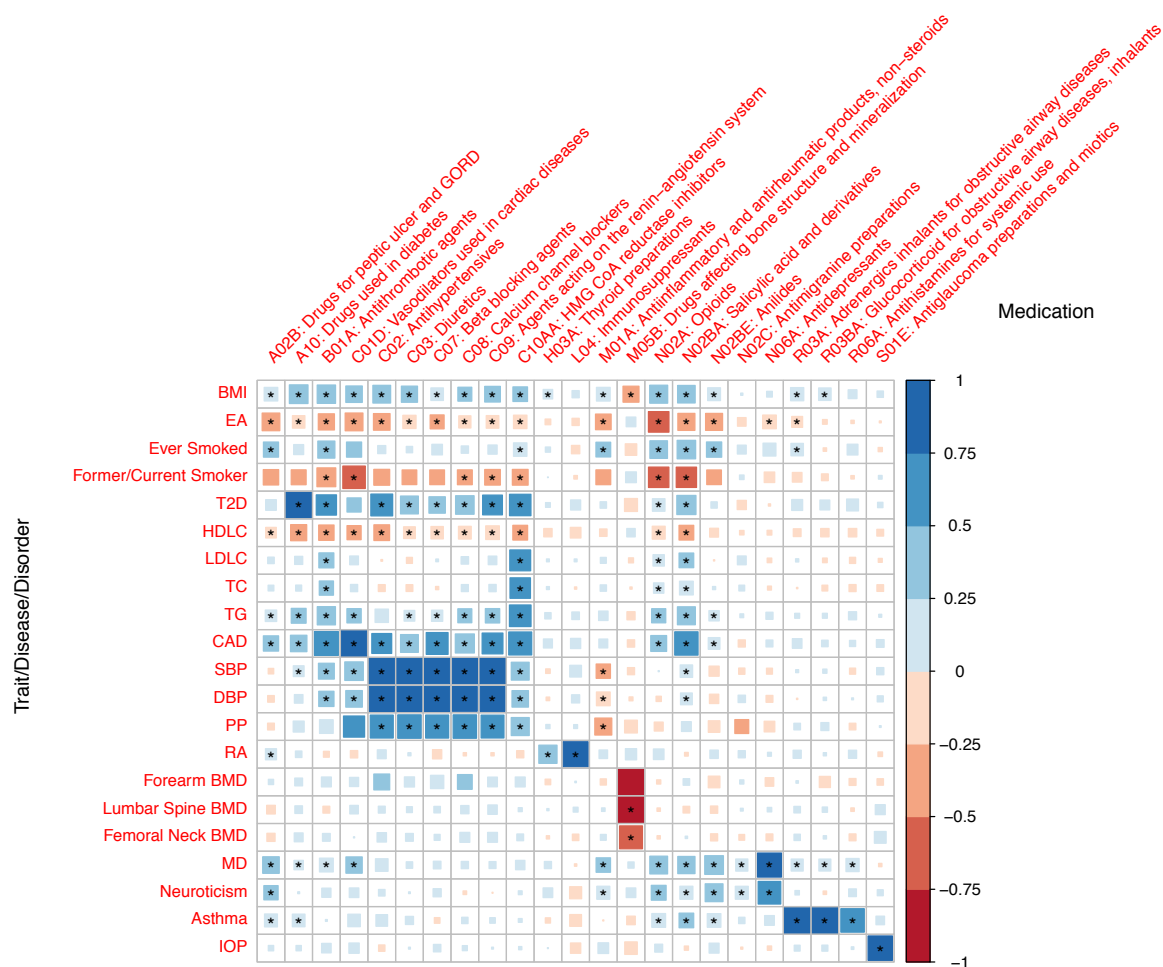

523 **Figure 4.** Genetic correlation of the 23 medication-taking traits and 21 diseases/traits related  
 524 to them.

525 Abbreviations: Body mass index (BMI), Education attainment (EA), Type 2 diabetes (T2D),  
 526 High-density lipoprotein cholesterol (HDLC), Low-density lipoprotein cholesterol (LDLC),  
 527 Total cholesterol (TC), Triglyceride (TG), Coronary artery disease (CAD), Systolic blood  
 528 pressure (SBP), Diastolic blood pressure (DBP), Pulse pressure (PP), Rheumatoid arthritis  
 529 (RA), Bone mineral density (BMD), Major depression (MD), Intraocular pressure (IOP).

530

531

532

533

534

535

536

537

538

539

540

541

542  
 543  
 544  
 545  
 546  
 547  
 548  
 549  
 550  
 551  
 552  
 553  
 554  
 555  
 556  
 557  
 558  
 559  
 560  
 561  
 562  
 563  
 564  
 565  
 566  
 567  
 568  
 569  
 570

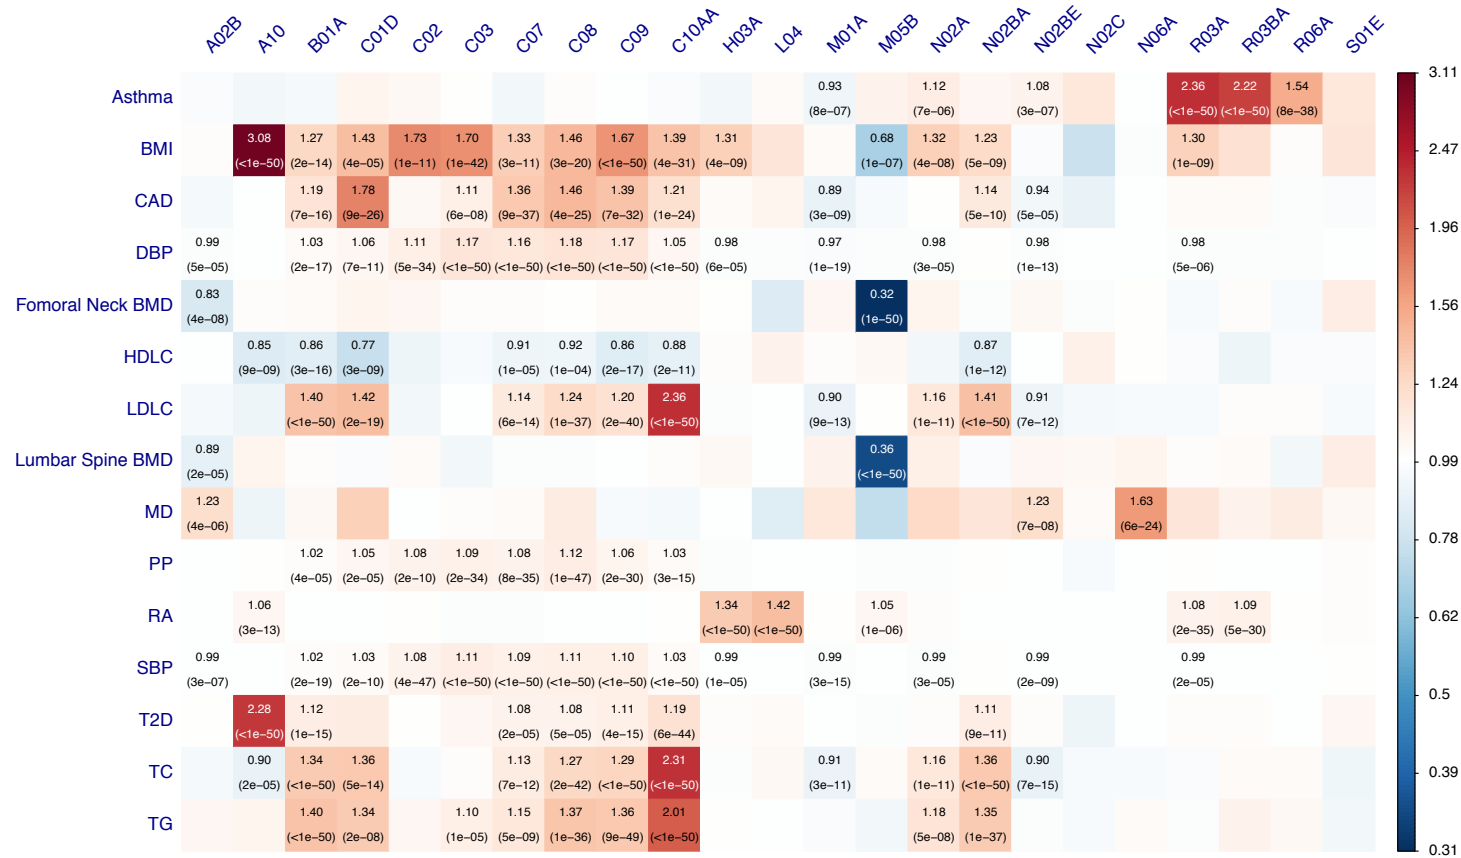

**Figure 5.** Mendelian Randomisation results using published SNPs associated with 15 diseases/traits as instrument. Rows are the exposure traits and columns are the outcome medication traits. Rows represent exposure and columns represent outcome. The significant effects after correcting for 345 tests ( $P$  value  $\leq 1.4 \times 10^{-4}$ ) are labelled with OR ( $P$  value). The OR is per SD in liability when the exposure is disease. Abbreviation: Body mass index (BMI), Coronary artery disease (CAD), Diastolic blood pressure (DBP), Bone mineral density (BMD), High-density lipoprotein cholesterol (HDLC), Low-density lipoprotein cholesterol (LDLC), Major depression (MD), Pulse pressure (PP), Rheumatoid arthritis (RA), Systolic blood pressure (SBP), Type 2 diabetes (T2D), Total cholesterol (TC), Triglyceride (TG).

571 **Acknowledgments**

572 We thank members of The University of Queensland Program in Complex Trait Genomics  
573 group. This research was supported by the Australian National Health and Medical Research  
574 Council (Grant Number: 1113400, 1078901, 1078037). Yeda Wu is supported by the F.G.  
575 Meade Scholarship and UQ Research Training Scholarship from the University of  
576 Queensland. This study makes use of data from UK Biobank (Project ID: 12514) and we  
577 thank the UK Biobank participants and the UK Biobank team for generating an important  
578 research resource.

579

580 **Author contributions**

581 P.M.V. , N.R.W. and Y.W conceived and designed the experiment. Y.W. performed the  
582 analysis with assistance and guidance from E.M.B., Z.Z., K.E.K., J.Y., Z.Z., K.E.K. and L.Y.  
583 contributed to data quality of UKB data. Y.W., P.M.V. and N.R.W. wrote the manuscript  
584 with the participation of all authors.

585

586 **Declaration of interests**

587 We declare that all authors have no competing interests.
